1        **The route of vaccine administration determines whether blood neutrophils undergo long-term**  
2 **phenotypic modifications**

3

4        Yanis Feraoun<sup>1</sup>, Jean-Louis Palgen<sup>1</sup>, Candie Joly<sup>1</sup>, Nicolas Tchitchek<sup>4</sup>, Ernesto Marcos-Lopez <sup>1</sup>, Nathalie  
5 Dereuddre-Bosquet<sup>1</sup>, Anne-Sophie Gallouet<sup>1</sup>, Vanessa Contreras<sup>1</sup>, Yves Lévy<sup>2,3</sup>, Frédéric Martinon<sup>1</sup>, Roger Le  
6 Grand<sup>1</sup>, and Anne-Sophie Beignon<sup>1\*</sup>

7

8        <sup>1</sup>Université Paris-Saclay, Inserm, CEA, Center for Immunology of Viral, Auto-immune, Hematological  
9 and Bacterial Diseases (IMVA-HB/IDMIT), Fontenay-aux-Roses & Le Kremlin-Bicêtre, France

10        <sup>2</sup>INSERM U955, Henri Mondor Hospital, University of Paris East, Créteil, France.

11        <sup>3</sup>VRI, Créteil, France.

12        <sup>4</sup>UMR\_S 959, Immunology-Immunopathology-Immunotherapy (i3), Sorbonne Université and Inserm,  
13 Paris, France.

14        \*correspondance: [anne-sophie.beignon@cea.fr](mailto:anne-sophie.beignon@cea.fr)

15

16        **Article type:** Original Research article

17        **Number of words:** 10 055 words

18        **Number of figures:** 5 figures

19        **Number of tables:** no table

20        **Supplementary information:** 2 supplementary figures and 1 supplementary table

21        **Keywords:** vaccine, innate immunity, innate immune memory, trained immunity, Modified vaccinia  
22 virus Ankara (MVA), administration routes, mass cytometry (CyTOF)

23        **ABSTRACT**

24        Innate immunity modulates adaptive immunity and defines the magnitude, quality, and longevity of  
25 antigen-specific T- and B- cell immune memory. Various vaccine and administration factors influence the  
26 immune response to vaccination, including the route of vaccine delivery.

27        We studied the dynamics of innate cell responses in blood using a preclinical model of non-human  
28 primates immunized with a live attenuated vaccinia virus, Modified vaccinia virus Ankara (MVA), and mass  
29 cytometry. We previously showed that MVA induces a strong, early, and transient innate response, but also  
30 late phenotypic modifications of blood myeloid cells after two months when injected subcutaneously. Here,  
31 we show that the early innate effector cell responses and plasma inflammatory cytokine profiles differ  
32 between subcutaneous and intradermal vaccine injection. Additionally, we show that the intradermal  
33 administration fails to induce more highly activated/mature neutrophils long after immunization, in contrast  
34 to subcutaneous administration.

35        Different batches of antibodies, staining protocols and generations of mass cytometers were used to  
36 generate the two datasets that were compared. Mass cytometry data were analyzed in parallel using the  
37 same analytical pipeline based on three successive clustering steps, including SPADE, and categorical  
38 heatmaps were compared using the Manhattan distance to measure the similarity between cell cluster  
39 phenotypes.

40        Overall, we show that the vaccine *per se* is not sufficient for the late phenotypic modifications of innate  
41 myeloid cells, which are evocative of innate immune training. Its route of administration is also crucial, likely  
42 by influencing the early innate response, and systemic inflammation, and the vaccine biodistribution.

## 43 INTRODUCTION

44 Vaccination is among the major advances in terms of public health by conferring protection against  
45 many infectious diseases. However, there are still no vaccines against several pathogens, such as the human  
46 immunodeficiency virus (HIV). Furthermore, certain vaccines are still insufficiently effective, such as flu  
47 vaccines, which are not universal but seasonal, or intradermal vaccination with *Mycobacterium bovis* bacillus  
48 Calmette-Guérin (BCG), which displays variable efficacy in preventing tuberculosis (TB) in adolescents and  
49 adults. These examples highlight the importance of carrying out in-depth investigations on the modes of  
50 action of vaccines to better understand the host and vaccine factors that influence innate and adaptive  
51 immune responses to vaccination (1) to guide and improve vaccine design.

52 The early innate immune response is not only among the first lines of antiviral defense but also  
53 orchestrates and modulates the antigen-specific effector and memory B- and T-cell responses by determining  
54 the frequency, functions, and dynamics of antigen-specific T and B cells (2,3). This is indeed the principle of  
55 vaccination.

56 The route of vaccine administration influences antigen/adjuvant trafficking, local and systemic  
57 inflammation, innate effectors, and the resulting adaptive immune response (4–7). We have shown that, like  
58 the antigen-specific antibody and T-cell responses, the early innate responses differ between subcutaneous  
59 (SC) and intradermal (ID) immunization, with the recruitment of distinct cell populations and activation of  
60 different immunomodulatory genes in skin and blood in response to a model live attenuated vaccine,  
61 Modified vaccinia virus Ankara (MVA), in non-human primates (NHPs) (8).

62 Here, we investigated the long-term impact of the route of vaccine delivery on the innate myeloid cell  
63 compartment. We hypothesized that the different early innate effector responses may lead to different  
64 innate immunological imprintings, which may last several weeks or months following vaccine injection. We  
65 previously showed that a SC injection of MVA induced late changes in the phenotype of innate myeloid cells  
66 in monkeys (9,10). They occurred between two weeks and two months after SC immunization, in spite of the  
67 resolution of systemic inflammation, shown by a return to baseline blood leukocyte counts and inflammatory

68 cytokine levels. The innate myeloid response to a second MVA exposure two months later differed from the  
69 response to the first immunization, and to a second one two weeks later, in that it involved phenotypically  
70 more highly activated/mature neutrophils, monocytes, and dendritic cells (DCs). These late phenotypic  
71 modifications were associated with functional modifications as the *ex vivo* inflammatory response of PBMCs  
72 was enhanced short after the second immunization at two months compared to short after the first  
73 immunization and to a second immunization at two weeks (10).

74       We thus reused the mass cytometry dataset that originated from this previous preclinical study with  
75 macaques immunized with MVA SC (9,10) and compared the innate myeloid cell response with a newly  
76 generated dataset after ID injection. CYTOF data were analyzed similarly but independently, using sequential  
77 optimized clustering steps. They were compared using a strategy that we formerly developed that is based  
78 on categories of marker expression and Manhattan distance (10). Here, we demonstrate that ID  
79 administration of MVA failed to modify the phenotype of blood neutrophils long after immunization, contrary  
80 to SC injection, and although it mobilized neutrophils early after immunization.

## 81 **MATERIALS AND METHODS**

### 82 **Animals**

83 Adult male cynomolgus macaques (*Macaca fascicularis*) (n = 6, identified as 1BJR13, 1BJZ13, 1BLE13,  
84 1GW14, AF103H and AN363H) were imported from Mauritius and housed in the CEA animal facility in  
85 Fontenay-aux-Roses, France.

### 86 **Vaccine, immunization and blood sampling**

87 Animals were immunized twice, two months apart, with the ANRS recombinant MVA-HIV B vaccine  
88 (Transgene) at a dose of  $4 \times 10^8$  plaque forming units (PFU) by ID injections distributed over 10 injection  
89 points (150  $\mu$ L/point of injections, all along the back, in two columns). Recombinant HIV-1 antigens consisted  
90 of the complete sequence of gag, fused to fragments from pol (residues 172-219, 325-383 and 461-519) and  
91 nef (residues 66-147 and 182-206) of the Bru/Lai isolate. Blood samples were taken longitudinally before and  
92 after immunizations in either lithium-heparin (Greiner Bio-One) for mass cytometry analysis, or in  
93 ethylenediaminetetraacetic acid (EDTA) (Greiner Bio-One) for complete blood counts (CBCs) and plasma  
94 preparation. The same batch and dose of vaccine and vaccine schedule, but a different route of  
95 administration, were used relative to a previous preclinical study that analyzed innate responses after SC  
96 immunization (9), and for which the mass cytometry dataset was reused here.

### 97 **Determination of plasma antibody titers**

98 Direct enzyme-linked immunosorbent assays (ELISA) were performed according to a previously  
99 published protocol (10) to determine total IgG titers specific to MVA in macaque EDTA-plasma. Antibody  
100 titers were calculated by extrapolation from a five-parameter logistic curve representing optical density (OD)  
101 versus plasma dilution and were defined as the reciprocal of the plasma dilution up to two times the OD of  
102 the plasma taken before corresponding immunization and diluted to 1:50.

103 Neutralizing antibody titers were evaluated using a previously described cell-based assay (10) based  
104 on the infection of HeLa cells with MVA-eGFP pre-incubated with serial dilutions of plasma-EDTA and flow

105 cytometry analysis The curve representing the percentage of living eGFP<sup>+</sup> cells as a function of the dilution of  
106 plasma-EDTA was plotted to calculate the neutralizing titer, equal to the reciprocal of the dilution of the  
107 sample resulting in two times less infected cells than after incubation with the plasma of the same macaque  
108 taken before immunization and diluted 1: 100.

#### 109 **Complete blood count**

110 Blood cell counts were determined from EDTA blood using an HMX A/L analyzer (Beckman Coulter).

#### 111 **Measurement of plasma cytokine concentrations**

112 The following cytokines, chemokines, and growth factors were quantified in plasma using a 23-plex  
113 MAP NHP immunoassay kit (PCYTMG-40K-PX30, Millipore) following the manufacturer's recommendations:  
114 IL-17, GM-CSF, IFN- $\gamma$ , IL1- $\beta$ , IL1RA, IL-2, IL-4, IL-5, IL-6, IL-8, IL-10, IL-13, IL-12/23(p40), IL-15, IL-18, MCP1,  
115 MIP1- $\alpha$ , MIP1-b, scCD40L, TGF- $\alpha$ , TNF- $\alpha$ , VEGF, and G-CSF. Cytokine concentrations (in pg/mL) are plotted  
116 as a function of time (in days). The area under the curves (AUCs) of the early cytokine response after the first  
117 MVA immunization (H0 post-prime (PP) to D14PP) were calculated using GraphPad Prism 9 to represent the  
118 kinetics and magnitude of cytokine release as a single value. GM-CSF could not be quantified in plasma from  
119 SC-vaccinated animals. Heatmap was generated with DisplayR.

#### 120 **Statistics**

121 Ab titers, CBC and cytokine concentrations after ID immunizations were compared with Wilcoxon tests,  
122 whereas CBC after SC and ID injections were compared with unpaired two-tailed t tests, using GraphPad  
123 Prism 9.

#### 124 **Leukocyte staining and acquisition by mass cytometry**

125 A distinct, albeit highly similar, Ab panel (addition of 6 and suppression of 3 markers) and staining  
126 protocol (with or without heparin and with or without barcoding) were used between the ID and SC studies  
127 and the samples were acquired on a CyTOF 1 and Helios instrument for the SC and ID studies, respectively.  
128 Leukocytes were fixed extemporaneously without *ex vivo* restimulation and frozen following a previously

129 described protocol that allows the analysis of all leukocytes and minimizes the batch effects inherent to the  
130 use of fresh cells (9). Briefly, three million fixed leukocytes were thawed and stained with a panel of Abs  
131 targeting innate myeloid cells (**Table S1**) in the presence of 300 U heparin to prevent nonspecific binding of  
132 metals by eosinophils (11). Purified Abs were conjugated to lanthanide metals using MAXPAR Lanthanide  
133 Staining kits (Fluidigm, South San Francisco, California, USA) following the recommendations of the supplier.  
134 Cells were barcoded using the Cell-ID 20-Plex Pd barcoding kit (Fluidigm). After washing in Barcode Perm  
135 Buffer, cells were incubated with one of the indicated combinations of Pd for 30 min at room temperature.  
136 Data were acquired using a Helios mass cytometer (Fluidigm) the day after staining after an overnight  
137 incubation in 0.1  $\mu$ M iridium in PBS +1,6% PFA.

#### 138 **Quality control and reproducibility**

139 We controlled the quality and reproducibility of each staining and acquisition session (3 sessions in  
140 total with samples for all timepoints of interest from macaques 1BJR13 and 1BJZ13, 1BLE13 and 1GW14, and  
141 AF103H and AN363H) by staining and acquiring control samples consisting of aliquots of fixed and frozen  
142 blood leukocytes from a healthy macaque after *ex vivo* stimulation of whole blood for 2 hours with three TLR  
143 ligands: LPS (LPS *E. coli* 0111: B4, Invivogen) at 1  $\mu$ g/mL, Poly I-C (Invivogen) at 100  $\mu$ g/mL, and R848  
144 (Mabtech) at 10  $\mu$ M in the presence of Brefeldin A (10  $\mu$ g/mL, SIGMA) for the last hour, in parallel with the  
145 tested samples. Comparison of the expression profiles of all markers by the control samples led us to exclude  
146 data from the first staining and acquisition session comprising the samples of two macaques (1BJR13 and  
147 1BJZ13), as well as certain markers (CCR5, CXCR4, CD125, CD39, CD23, IL-1a) for which the expression profiles  
148 were too different from those of the two other staining and acquisitions sessions (**Figure S1**).

#### 149 **Mass cytometry data preprocessing**

150 Zero mean signal intensity (MSI) values were first randomized between -1 and 0 to avoid a bias in the  
151 density estimation by the SPADE algorithm. The FCS files were then normalized using the MATLAB program  
152 by Rachel Finck et al (12). Tube replicates were concatenated using the Cytobank tool (Mountain View,  
153 California, USA). Samples were de-barcoded using Debarcoder software (Fluidigm, San Francisco, USA)

154 following the instructions of the user guide. The initial manual gating included the definition of singlets (based  
155 on Ir191/cell length), intact cells (Ir191/Ir193), no beads (Ce140/ Gd155), and the exclusion of CD3+CD66+  
156 cells using Cytobank, as previously described (9). Although the use of heparin strongly reduced the  
157 nonspecific staining of eosinophils, a small number of CD3<sup>+</sup>CD66<sup>+</sup> cells were still present and were excluded  
158 (approximately 0.2% of all acquired events).

#### 159 **Automatic identification of cell populations with SPADE**

160 The spanning-tree progression analysis of density-normalized events (SPADE) clustering algorithm (13)  
161 was used to automatically identify cell clusters or groups of cell clusters composed of phenotypically similar  
162 cells within the dataset consisting of singlet non-CD66<sup>+</sup> CD3<sup>+</sup> leukocytes from macaques (n = 4) collected at  
163 various timepoints (H0PP, H6PP, D14PP, H0 post-boost (PB), H6PB, and D14PB). Uniform random  
164 downsampling was used to select 100,000 cells from each sample (corresponding to the number of cells  
165 contained in the smallest sample) before a final upsampling step. The optimal SPADE parameters were  
166 determined using the SPADEVizR package (14) in R. The quality of the clustering was quantified as the  
167 percentage of clusters with a unimodal and narrow distribution for all markers of the classification. Marker  
168 distributions were assessed using the Hartigan's dip test (p-value < 0.05 to reject the unimodality hypothesis).  
169 Markers distributions with an interquartile range < 2 were considered narrow.

#### 170 **Heatmap representation of cell clusters**

171 The SPADE tree was manually annotated based on the expression of key markers (CD1c, CD3, CD4,  
172 CD8, CD11c, CD14, CD16, CD20, CD66, CD123, CD125, CD172a, CADM1, and HLA-DR) to identify granulocyte  
173 clusters (**Figure S2**). A heatmap allowing easy visualization of the complete phenotype of each cluster of  
174 granulocytes was generated using the SPADEVizR by hierarchical clustering of clusters and markers based on  
175 the Euclidean metric (14). The range of expression of markers was divided between the 5<sup>th</sup> and 95<sup>th</sup> percentile  
176 into five categories for all clusters of cells. For each cluster, samples containing less than 50 cells were  
177 excluded from phenotype inference.

#### 178 **Definition of phenotypic families**



179 Clusters of cells sharing similar phenotypes were gathered into phenotypic families and superfamilies  
180 on the basis of the dendrogram resulting from the hierarchical clustering of the clusters, which were  
181 annotated manually. The number of cells for a given cell population was calculated as follows:  $CBC \times$   
182 population frequency.

### 183 **Phenotypic comparison of cell clusters**

184 Both SC and ID datasets were analyzed independently using the same strategy. Clusters were  
185 compared two by two by calculating the Manhattan distance between the categories of expression of the  
186 clustering markers shared between the two datasets and visualized using the package CytoCompare in R (15).

187        **RESULTS**

188        **MVA injected ID induces a strong specific humoral response**

189        Adult macaques (n = 6) were immunized with  $4 \times 10^8$  PFU of recMVA HIVB by ID injections twice, two  
190 months apart (**Figure 1A**). We assessed the humoral response to confirm the efficiency of vaccination, as Abs  
191 are the main immune correlate of protection for most vaccines (16), including vaccinia virus (VACV) and MVA  
192 against smallpox (17). As previously shown (8), MVA was highly immunogenic after ID injection. It induced  
193 high levels of MVA-specific IgGs (**Figure 1B**). As expected, the peak of the secondary response was higher  
194 than that of the primary response. Titers remained elevated, plateauing at  $117,335 \pm 50,060$  28 days post-  
195 boost. Neutralizing activity was only detected after the second immunization (**Figure 1C**). The analysis was  
196 performed using EDTA-plasma, precluding a direct comparison with the Ab response induced in macaques  
197 identically immunized previously but through the SC route (10), which were analyzed using sera. However,  
198 in a previous comparative study, we reported that the adaptive responses differed between ID and SC MVA  
199 immunizations, with SC delivery inducing higher levels of nAbs, and ID delivery inducing more polyfunctional  
200 CD8<sup>+</sup> T cells (8).

201        We next analyzed the innate immune response in blood overtime, as it shapes and can even predict  
202 the magnitude, quality, and persistence of the Ab response, with myeloid cells playing a key role in capturing  
203 and presenting vaccine antigens to B and T lymphocytes, we next analyzed them in blood over time.

204        **ID and SC immunizations with MVA induces strong but distinct inflammatory responses**

205        ID injections induced a rapid and massive increase in the number of total leukocytes in blood ( $1.88 \pm$   
206  $0.29$  times more leukocytes per milliliter of blood within 6 hours,  $p < 0.0001$ ), but it was transient (the CBC  
207 decreased as soon as one day after immunization and returned to baseline 14 days post-immunization) and  
208 largely due to an increase in the number of granulocytes and, to a lesser extent, monocytes (**Figure 2A**). There  
209 was no difference between the first and second ID immunization ( $p = 0.95$ , paired t-test comparing the  
210 abundances at H6PP and H6PB). SC immunizations triggered a greater statistically significant increase in the  
211 total number of leukocytes, granulocytes, and monocytes (**Figure 2B**).

212 We next identified the systemic cytokine signature of MVA injected ID. The AUC, as an approximation  
213 of exposure over time, showed that, among 22 tested soluble factors, 16 cytokines were produced in  
214 response to the first ID injection: IL-12/23(p40), MCP-1, sCD40L, IL-1ra, VEGF, IL-10, IL-8, IL-13, G-CSF, IL-2,  
215 TNF- $\alpha$ , MIP-1 $\alpha$ , IL-5, TGF- $\alpha$ , IL-4, and IL-17 (from the highest to the lowest cumulative concentrations) (**Figure**  
216 **3A**). Only two cytokines differed significantly between the first and second ID immunization: MCP-1  
217 concentrations decreased ( $p = 0.003$ ) and those of IL-1b increased ( $p = 0.02$ ). The cytokine profiles after the  
218 first ID or SC immunization differed quantitatively and qualitatively (**Figures 3B and 3C**). Immunization by the  
219 ID route induced a 1.79 times greater production of cytokines than that by the SC route ( $p = 0.009$ ; Wilcoxon  
220 tests), with five cytokines representing more than 90% of those produced (**Figure 3B**), whereas immunization  
221 by the SC route resulted in a more diverse cytokine production profile, with five additional cytokines: MIP-  
222 1 $\beta$ , IL-15, IFN- $\gamma$ , IL-6, and IL-1 $\beta$  (**Figures 3B**). Unsupervised hierarchical clustering showed SC-immunized  
223 animals to be highly similar to each another in terms of cytokine production, in contrast to ID-immunized  
224 animals, which showed greater heterogeneity(**Figure 3C**). Based on the cytokine dendrogram, the following  
225 cytokines distinguished between the two routes of MVA delivery: IL-15, IFN- $\gamma$ , MIP-1 $\beta$ , IL-6, TGF- $\alpha$ , IL-1 $\beta$ , IL-  
226 4, IL-5, IL-2, TNF- $\alpha$ , MIP-1 $\alpha$ , IL-17, and G-CSF (**Figure 3C**).

227 Overall, our results showed that MVA injected ID led to strong systemic inflammation, which was  
228 resolved rapidly. The inflammatory response was comparable between the first and second ID injection,  
229 except for IL-1b and MCP-1, but different from that following SC injection in terms of the magnitude of the  
230 cellular response and cytokine profile in blood. We next extensively characterized the phenotype of innate  
231 blood myeloid cells over time after MVA ID immunizations.

### 232 **Blood granulocytes are highly heterogeneous and diverse**

233 Blood leukocytes were stained with iridium and a panel of 35 titrated lanthanide-conjugated  
234 antibodies targeting innate myeloid cells, including granulocytes (**Figure 4A and Table S1**), and analyzed by  
235 mass cytometry. We used a previously described analysis pipeline (9) comprised of several successive  
236 clustering steps to identify cell clusters and groups of cell clusters with a similar phenotype and characterize

237 their dynamics in response to immunizations (**Figure 4B**). The SPADE algorithm was first applied to all samples  
238 of the dataset. It consisted of 26 samples, corresponding to four of the six immunized macaques (1GW14,  
239 AF163H, AN363H, 1BLE13) and six time points (HOPP, H6PP, D14PP, HOPB, H6PB, and D14PB) (**Figure 1A**),  
240 minus two samples that were not available for technical reasons (HOPP for macaque 1BLE13 and D14PP for  
241 macaque 1GW14).

242 We compared various parameters of SPADE, with the following parameters found to be optimal: 800  
243 clusters, 22 clustering markers (CD66, HLA-DR, CD3, CD64, CD8, CD123, CD11a, CD11b, CD62L, CD4, FcεRI,  
244 CD86, CD172a, CD1c, CD32, CD16, CD11c, CD14, CD141, CD20, CCR7, and CADM1), and a downsampling of  
245 20%, enabling maximum quality clustering, with 58% of the clusters having a uniform and narrow distribution  
246 of all clustering markers. As expected, these parameters differed from those of the SC dataset (9). Cell  
247 clusters on the resulting SPADE tree cell were manually annotated based on the expression of several key  
248 markers (CD66, CD3, HLA-DR, CD8, CD123, CD4, CD125, CD172a, CD1c, CD16, CD11c, CD14, CD141, CD20,  
249 and CADM1) and the major leukocyte populations (B cells, T cells, NK cells, monocytes and DCs, and  
250 granulocytes) were identified (**Figure S2**).

251 We next focused the analysis on the granulocyte compartment, as our panel was solely dedicated to  
252 target innate myeloid cells, and because major phenotypic modifications occur mainly in granulocytes late  
253 after MVA SC immunizations (18). The phenotypes of the granulocytes involved in the vaccine response were  
254 organized in the form of a heatmap after hierarchical clustering of the cell clusters and markers, once the  
255 levels of expression were categorized into five classes of signal intensity (**Figure 5A**), to visualize them more  
256 easily. Based on the clusters dendrogram, clusters sharing a similar phenotype were grouped into so-called  
257 “phenotypic families” and further grouped into “superfamilies”. Sixteen distinct phenotypic families (1 to 16)  
258 were distinguishable and grouped into five superfamilies (A to E). Neutrophils (CD66<sup>hi</sup>) were clustered within  
259 three superfamilies (A, B and E) according to their relative level of activation within the dataset. Superfamily  
260 A (phenotypic families 1, 2, and 3) comprised the least activated neutrophils of the dataset, with very low to  
261 low expression of cytokines (especially IL-8) and activation markers (especially CD45). Superfamily B

262 (phenotypic families 4, 5, and 6) was composed of moderately activated neutrophils, with stronger  
263 expression of IL-8, CD86, CD39, CADM1, CD45, and CD11b, compared to superfamily A. Of note, among  
264 superfamily B, family 5 showed high expression of CD14, a characteristic already reported for neutrophils of  
265 cynomolgus macaques, without its function being clearly defined (19). Superfamily E (families 11, 12, 13, 14,  
266 and 15) contained the most highly activated neutrophils of this dataset, which expressed activation and  
267 migration markers and cytokines. This superfamily showed strong heterogeneity, from neutrophils of families  
268 11 and 12 with the highest expression of activation markers, including IL-8, CD14, CD11a, CD11c, CD141,  
269 CD16, CD86, and HLA-DR, to neutrophils from family 13 displaying a relatively less activated or mature profile.

270 Superfamily C (phenotypic families 7, 8, and 9) was clearly separated from the rest of the granulocytes.  
271 It included eosinophils with a CD66<sup>med</sup> CD125<sup>+</sup> phenotype and high expression of several markers, including  
272 CD45, CD62L, CD11a, CD125, CD23, IL-6, CXCR4, and FcεRI, suggesting strong activation, especially for family  
273 7. Nevertheless, these results must be interpreted with caution. The use of heparin during staining may have  
274 insufficiently inhibited interactions between the content of the eosinophilic granules and the metals  
275 conjugated to the Abs, and thus may have insufficiently prevented artefactual positive staining (11), making  
276 the phenotypic characterization of eosinophils by mass cytometry difficult.

277 Finally, basophils (CD123<sup>+</sup> HLA-DR<sup>-</sup>) were found in superfamily D (phenotypic families 10 and 16).  
278 Family 10 gathered basophils with a classic expression profile (CD123<sup>+</sup> IL-4<sup>+</sup> FcεRI<sup>+</sup>), whereas family 16  
279 grouped basophils with more diverse expression profiles.

280 Thus, we show a large phenotypic heterogeneity and diversity of blood macaque granulocytes, as  
281 previously reported (9). We next investigated whether the phenotypic diversity within the ID dataset was  
282 qualitatively close to, or different from that of the SC dataset.

### 283 **The ID and SC datasets share similar poorly and moderately, but not highly, activated neutrophils**

284 The analytical challenge for the phenotypic comparison between our two datasets lay in the use of  
285 different, albeit similar, Ab panels, Ab batches, staining protocols, and generations of mass cytometer, with  
286 different detection sensitivity. In addition, independent analyses were performed, following the same

287 workflow, but using different SPADE parameters (cluster numbers, clustering markers, and downsampling),  
288 which were optimally defined for each dataset. We opted for a phenotypic comparison of the cell clusters  
289 based on the Manhattan distance between the expression categories of the clustering markers shared  
290 between the two datasets to address this challenge. The proximity between cell cluster phenotypes is shown  
291 in the form of a circular graph after calculating for the sum of the absolute value of the difference between  
292 categories for each shared marker for each paired clusters. This distance was penalized when one of the  
293 terms was greater than 1. Distances equal to or less than 11 were considered as significant, and are  
294 represented by linking the two compared cell clusters (**Figure 5B**).

295       As expected, the eosinophils (superfamily C) from the ID dataset could not be associated with any  
296 cluster from the SC dataset, as they were removed from the analysis due to of their nonspecific staining in  
297 the absence of heparin during staining. Conversely, we found associations between basophils from the ID  
298 and SC datasets, in particular from family 10. More importantly, only the least activated and moderately  
299 activated neutrophils from the ID dataset were associated with neutrophils from the SC dataset, specifically  
300 with the poorly and moderately activated neutrophil families. On the contrary, the vast majority of the most  
301 highly activated neutrophils from the ID dataset were not associated with any neutrophil cluster of the SC  
302 dataset. Only neutrophils from family 13 from the ID dataset were associated with neutrophils of the SC  
303 dataset, either with moderately or highly activated neutrophils. As previously shown, these neutrophil  
304 clusters did not exist prior to SC immunization. They were induced long after MVA prime immunization (9)  
305 and responded to the second immunization. They were part of the SC boost signature defined in the LASSO-  
306 LDA model (9).

307       Such a phenotype-limited comparison provides information about the presence of shared (basophils  
308 and poorly and moderately activated neutrophils) or specific (highly activated neutrophils) cell populations  
309 between the two datasets, both showing a high diversity of phenotypes, but does not indicate when, or in  
310 what proportion these granulocytes circulate in blood before and after ID *versus* SC immunizations.

311        **ID injection does not result in late modifications of the blood neutrophil phenotype, in contrast to**  
312 **SC injection**

313        We determined the impact of ID injections on granulocyte populations by investigating the differences  
314 in their cell abundance over time represented as pie-charts (**Figure 5C**). As classically shown, eosinophils and  
315 basophils were the least numerous granulocytes present at baseline and did not show major changes in  
316 frequency after the first or second immunization. Among neutrophils, clusters from two superfamilies, the  
317 least (families 1, 2, and 3, which matched families 5, 7, 3, 1, 11, 13, and 4 in the SC dataset, **Figure 5B**) and  
318 most highly activated neutrophils (families 11 and 12 which were not phenotypically associated with  
319 neutrophils within the SC dataset, **Figure 5B**) were found at baseline. They represented the majority of cell  
320 types. Thus, the steady-state differed between studies, as neutrophils present before SC immunization were  
321 poorly and moderately activated (9). Six hours after the first ID immunization, the number of granulocytes  
322 increased, without major modifications in the proportion of the various subpopulations, still with a  
323 predominance of the least and most highly activated neutrophils. On day 14, cell counts returned to baseline  
324 values. Hence, the early response of granulocytes differed between ID and SC in magnitude and composition,  
325 but from the beginning. Long after the first ID immunization, and immediately before the second, the  
326 granulocyte composition showed slight changes, whereas the cell counts remained at the basal level. The  
327 frequency of the least activated neutrophils was slightly lower, in favor of the most highly activated  
328 neutrophils and, to a lesser extent, moderately activated neutrophils, which were almost absent at baseline,  
329 although the difference was not statistically significant. This redistribution was not commensurate with the  
330 major modifications of composition seen long after SC immunization, with the appearance of highly activated  
331 neutrophils (9,10), which had no counterpart in the ID dataset (**Figure 5B**). Finally, the neutrophil responses  
332 to the first and second ID immunizations highly resembled each other, in sharp contrast to what was observed  
333 after SC immunizations (9,10).

334        **DISCUSSION**

335        **ID administration of MVA fails to induce neutrophils that are more highly activated/mature long**  
336 **after immunization and that respond to a second immunization, in contrast to SC**

337        In-depth phenotyping by mass cytometry combined with an analysis pipeline composed of successive  
338 clustering steps, specifically and previously developed for longitudinal multidimensional data, allowed us to  
339 analyze the quantitative and qualitative differences between the innate myeloid cell responses in blood after  
340 one or two ID immunizations of MVA and to compare them to those following another route of immunization,  
341 SC, using the Manhattan distance to measure the similarities of phenotype between cell clusters. MVA  
342 administration induced the substantial, rapid, and transient recruitment of granulocytes to blood, regardless  
343 of its route of delivery. However, such early mobilization was stronger after SC injection of the vaccine.  
344 Granulocyte counts increased, whereas the cell subset composition remained unchanged early after the first  
345 ID and SC immunization, mirroring that present before immunization. The early response to a second ID  
346 injection of the vaccine did not differ from the first in terms of magnitude and dynamics. Most importantly,  
347 it involved a similar distribution of cell subsets, in contrast to the response to a second SC injection, which  
348 engaged more highly mature/activated cells that were induced long after the first administration of the  
349 vaccine (9). Thus, depending on the route of MVA administration, not only the Ab and T cells responses (8),  
350 and the early inflammatory/innate responses to the first immunization (**Figures 2B, 3 and 5C**, and as  
351 previously shown (8,9)) differed, but also the long-term impact on neutrophils (**Figure 5C** and as previously  
352 shown (9)).

353        **Comparing high dimensional cytometry datasets**

354        High-dimensional cytometry, including mass cytometry and spectral flow cytometry, is a powerful  
355 technique to monitor immunity, identify cell subsets associated with diseases or potent responses to  
356 vaccines, and decipher the complex mechanisms of the immune response to vaccines (20–27). However, the  
357 comparison and integration of different datasets generated at multiple sites and on different days is  
358 challenging, even when using the same technology. This is due to technical differences, called batch effects,



359 that affect the signal intensity (on which commonly used unsupervised analytical methods, such as SPADE,  
360 visNE, FlowSOM, CITRUS, and UMAP, are based) and need to be distinguished from true biological variability  
361 (28). Several algorithms have been proposed to normalize signal intensity to reduce batch effects before  
362 unsupervised cell cluster identification and to compare multiple datasets, such as CytofRUV (29), and JSOM  
363 (30). iMUBAC can even compare different datasets in the absence of shared technical replicates, used as  
364 reference samples, by overlaying cells from several healthy controls as anchors (31).

365       The issue here is somewhat distinct, as the two datasets were analyzed separately. The raw mass  
366 cytometry data generated after the SC immunizations were not re-analyzed together with the mass  
367 cytometry data newly generated after the ID immunizations, and after batch effect correction. High intra-  
368 cluster homogeneity was achieved using the SPADEVizR package for each independent analysis. Then, cells  
369 from the two vaccine immunogenicity studies (SC vs ID vaccine administration) were matched by comparing  
370 their categories of marker expression, instead of the mean intensity, to mitigate the expected technical  
371 differences in staining efficacy and cytometer sensitivity. Five categories were defined based on the range of  
372 expression of each marker between the 5<sup>th</sup> and 95<sup>th</sup> percentiles for each dataset. Distances were calculated  
373 as the sum of the absolute value of the Manhattan distance between the categorical values for each shared  
374 marker of each cluster. Two clusters were associated if the sum was below a certain threshold, and a penalty  
375 was applied, if the value of a term was too high. The threshold and penalty were set after trial and error and  
376 manual inspection of the heatmap and marker expression profiles between clusters. Given the large  
377 differences in the neutrophil response to MVA between the two delivery routes, such a simple method, and  
378 admittedly not scalable nor benchmarked against other algorithms, such as overlaying cell clusters onto a  
379 reference scaffold map (32), or measuring the quadratic form distance post-clustering (33), proved to be  
380 sufficient to define a stringent cluster-wise comparison.

### 381       **Neutrophils and the humoral response to vaccines**

382       Neutrophils are the most numerous leukocytes in the blood. Their unexpected phenotypic and  
383 functional heterogeneity, and plasticity have been recently reported (34). Apart from their key antimicrobial

384 activity, they shape adaptive immunity (35,36) by releasing cytokines and chemokines, granules, and NETs  
385 and by interacting with other immune cells and eventually acting as antigen presenting cells (APC) (37,38).  
386 Neutrophils can directly provide B-cell help through the production of BAFF and, hence, contribute to plasma-  
387 cell generation and antigen-specific Ab production (39–41). Whether and how neutrophil subsets, including  
388 highly activated neutrophils induced long after MVA SC injection, interact with B cells and modulate the  
389 primary and secondary MVA-specific Ab response is yet to be determined.

### 390 **Innate immune training and vaccines**

391 Certain vaccines, in particular certain live attenuated vaccines, such as BCG and oral poliomyelitis  
392 vaccine (OPV), also provide protection against unrelated pathogens beyond the pathogen they initially target  
393 by a process called nonspecific effects of vaccines (NSE) (42). Cross-reactive T and B cells and antibodies  
394 (Abs), bystander activation, and innate immune memory, also called trained immunity, contribute to NSE. By  
395 definition, trained cells respond faster and more strongly to a secondary challenge with homologous or even  
396 heterologous pathogens than a 'naïve' cells, long after the initial stimulation (43). The mechanisms of trained  
397 immunity involve the epigenetic reprogramming of innate cells, which are known to be short-lived, and that  
398 of their hematopoietic stem and progenitor cells (HSPCs) in the bone marrow (BM). Resting trained cells  
399 display an enhanced responsiveness to a challenge without having themselves encountered the trained  
400 immunity-inducing stimulus, by inheritance from their HSPCs. BCG is a canonical trained immunity stimulus.  
401 It induces trained monocytes and neutrophils (44–46) that contribute to its anti-TB and nonspecific protective  
402 effects (47). In addition to BCG, several microbial, as well as endogenous, ligands have been shown to imprint  
403 innate cells, with increased pro- or anti-inflammatory responsiveness that may be beneficial or detrimental  
404 to the host (18).

405 SC injection of MVA, but not ID, induced the late presence of highly activated neutrophils that were  
406 better equipped to respond to a second injection. This raises the questions of whether these cells are  
407 authentic trained cells, how they compare with BCG-induced innate memory cells in terms of features and  
408 origin, and how the route of MVA delivery influence their generation.

409 The literature has emphasized the enhanced responsiveness of blood trained cells to challenge through  
410 the persistence of epigenetic marks inherited from trained HSPCs. However, the modulation of expression of  
411 certain markers associated with increased activation by resting trained but unchallenged cells, including  
412 neutrophils, has been reported after BCG given ID to humans (46,48). The phenotypic modifications of  
413 neutrophils induced by MVA injected SC are yet to be associated with functional and epigenetic  
414 modifications.

415 The state of neutrophil activation prior to immunization differed between animals from the two  
416 cohorts, which were otherwise healthy, without any low-grade inflammation and with CBCs in the normal  
417 range. This is likely the result of their different immunological history related to different environmental  
418 exposure, although they were naive (*i.e.*, not previously experimentally immunized nor infected) (49). As  
419 recently stated, to the degree that vaccine-induced trained immunity can provide heterologous protection,  
420 the trained immune status at the time of vaccination may also modulate the immunogenicity of vaccines  
421 (50), including their capacity to further train innate cells.

#### 422 **Route of vaccine delivery and innate immune responses**

423 The route of injection determines the biodistribution of vaccines and their kinetics of expression,  
424 including those of VACV and MVA. In mice, MVA-expressing neutrophils were shown to migrate from the skin  
425 to the BM following ID injection (54). VACV can infect human BM hematopoietic stem cells *in vitro* (55).  
426 Intraperitoneal VACV injection in mice was shown to induce the rapid and transient expansion of HSPCs, with  
427 a bias towards common myeloid progenitors (CMP), which was MyD88 dependent. Finally, the route of MVA  
428 delivery modulates the early systemic inflammatory cytokine response, as reported here (**Figures 3B and 3C**).  
429 Not only did the profile of cytokines produced early in response to ID or SC delivery of MVA differ, but  
430 interestingly, IL-1 $\beta$  and IFN- $\gamma$ , proposed to play a key role in the induction of trained immunity (44,46,57,58),  
431 were differentially induced depending on the route of MVA delivery. Both were produced at low levels  
432 relative to those of other cytokines, and exclusively after SC injection. Whether MVA needs to reach and

433 reside in the BM for a while, to be directly detected by HSPCs, or even infect them, to induce the late  
434 modifications of neutrophil phenotype is not known.

435 BCG has previously been reported to induce trained monocytes in mice after intravenous (IV) injection,  
436 , but not after SC injection. BCG was present in the BM for up to seven months, where it infected  
437 monocytes/macrophages but not HSPCs after IV injection, whereas it was absent from the BM after SC  
438 injection. The long-term persistence of BCG in the BM was not required for the induction of immune training.  
439 The almost complete clearance of BCG from the BM by a four weeks antibiotic treatment with  
440 antimycobacterial drugs four weeks after IV injection did not prevent BM Lin-Sca1+c-Kit+ (LSK) cells to expand  
441 (44). In macaques, pulmonary mucosal delivery of BCG was also shown to induce trained monocytes in the  
442 blood and BM in more vaccinated animals than “classical” ID injection (50). However, whether the early  
443 systemic inflammatory/innate responses also contribute to the difference between IV and SC injection, or ID  
444 and mucosal delivery for innate immune training was not addressed.

445 Future studies are needed to fully understand which vaccines/adjuvants imprint innate cells long after  
446 their administration and how, in particular by defining the respective roles of the vaccine biodistribution and  
447 persistence, and the early inflammatory/innate response, to harness this property to optimize protection  
448 against infectious diseases, whether it is mediated by the innate or adaptive immune systems (18,59,60).

449 **DATA AVAILABILITY STATEMENT**

450 Mass cytometry data were deposited publicly. FCS files from the SC and ID studies are available on the  
451 FlowRepository database through ID FR-FCM-ZYBG and FR-FCM-Z4KJ, respectively.

452

453 **ETHICS STATEMENT**

454 The study was approved by the Ministry of National Education, Higher Education and Research and by  
455 the Ethics Committee in Animal Experimentation No. 44 under the reference A17003.

456

457 **AUTHOR CONTRIBUTION**

458 ASB, YL and RLG acquired funding; CJ, JLP, ASB, FM, and RLG designed the study; VC orchestrated the  
459 immunizations, longitudinal follow-up of the animals and biological sample collection and biobanking.  
460 CJ and JLP processed and biobanked biological samples; NDB generated plasma cytokine data; CJ and  
461 YF analyzed plasma cytokine data; YF stained samples for mass cytometry analysis; EML, and ASG  
462 acquired samples by mass cytometry; YF, JLP, NT, and ASB analyzed data; YF and JLP prepared the  
463 figures; YF and ASB wrote the original draft of the manuscript; YF, JLP, NT, RLG, and ASB reviewed and  
464 edited it. All the authors approved the submitted version.

465

466 **FUNDING**

467 This work was supported by the IDMIT infrastructure and funded by the ANR via grant No ANR-11-  
468 INBS-0008. N.T. held a fellowship from the ANRS (France Recherche Nord&Sud Sida-HIV Hépatites).  
469 This work was also supported by the “Investissements d’Avenir” programs managed by the ANR under  
470 reference ANR-10-LABX-77-01 funding the Vaccine Research Institute (VRI), Créteil (ImMemory  
471 research program) and ANR-10-EQPX-02-01 funding the FlowCyTech facility (IDMIT, Fontenay-aux-

472 Roses, France). Funds were also received from the European Commission: ADITEC, FP7-HEALTH-2011-  
473 280873; Transvac, EU H2020 GA 730964; EHVA, EU H2020 GA 681032.

474

#### 475 **ACKNOWLEDGEMENTS**

476 We deeply thank all the members of IMVA-HB/IDMIT, in particular Laetitia Bossevot, Benoit Delache,  
477 Nina Dhooge, Karine Gombert-Rannou, Oriane Lacroix, Sébastien Langlois, Julie Morin, and Jean-  
478 Marie Robert, members of the IDMIT core facilities ASW (Animal Welfare and Science), L2I  
479 (Immunology and Infectiology), and LFC (FlowCytech).

480

#### 481 **CONTRIBUTION TO THE FIELD STATEMENT**

482 We have previously reported, using an animal model highly relevant for human immunology, that a  
483 vaccine, when injected subcutaneously, triggered the presence of neutrophils better equipped to  
484 respond to a second vaccination long after the first one. Here we show that the intradermal injection  
485 of the same vaccine failed to induce such late neutrophil phenotypic modifications, although it  
486 mobilized neutrophils early after immunization. Single cells were analyzed by mass cytometry, a  
487 technique allowing their detailed characterization, and data from two vaccine studies were matched.  
488 Our contribution is twofold: (i) we demonstrate that the route of vaccine injection, likely through the  
489 modulation of the vaccine biodistribution and/or of the magnitude and quality of the early  
490 inflammatory/innate effector responses plays a role in the long-term innate immunological imprinting;  
491 (ii) we propose a simple method to compare existing and newly generated mass cytometry datasets  
492 post-clustering.

493        **REFERENCES**

- 494        1. Zimmermann P, Curtis N. Factors That Influence the Immune Response to Vaccination. *Clin*  
495        *Microbiol Rev* (2019) 32:e00084-18. doi:10.1128/CMR.00084-18
- 496        2. Sallusto F, Lanzavecchia A, Araki K, Ahmed R. From vaccines to memory and back. *Immunity* (2010)  
497        33:451–463. doi:10.1016/j.immuni.2010.10.008
- 498        3. Van Tilbeurgh M, Lemdani K, Beignon A-S, Chapon C, Tchitchek N, Cheraitia L, Marcos Lopez E,  
499        Pascal Q, Le Grand R, Maisonnasse P, et al. Predictive Markers of Immunogenicity and Efficacy for  
500        Human Vaccines. *Vaccines (Basel)* (2021) 9:579. doi:10.3390/vaccines9060579
- 501        4. Liard C, Munier S, Arias M, Joulin-Giet A, Bonduelle O, Duffy D, Shattock RJ, Verrier B, Combadière  
502        B. Targeting of HIV-p24 particle-based vaccine into differential skin layers induces distinct arms of  
503        the immune responses. *Vaccine* (2011) 29:6379–6391. doi:10.1016/j.vaccine.2011.04.080
- 504        5. Schmidt ST, Khadke S, Korsholm KS, Perrie Y, Rades T, Andersen P, Foged C, Christensen D. The  
505        administration route is decisive for the ability of the vaccine adjuvant CAF09 to induce antigen-  
506        specific CD8(+) T-cell responses: The immunological consequences of the biodistribution profile. *J*  
507        *Control Release* (2016) 239:107–117. doi:10.1016/j.jconrel.2016.08.034
- 508        6. Ols S, Yang L, Thompson EA, Pushparaj P, Tran K, Liang F, Lin A, Eriksson B, Karlsson Hedestam GB,  
509        Wyatt RT, et al. Route of Vaccine Administration Alters Antigen Trafficking but Not Innate or  
510        Adaptive Immunity. *Cell Rep* (2020) 30:3964-3971.e7. doi:10.1016/j.celrep.2020.02.111
- 511        7. Herzog C. Influence of parenteral administration routes and additional factors on vaccine safety  
512        and immunogenicity: a review of recent literature. *Expert Rev Vaccines* (2014) 13:399–415.  
513        doi:10.1586/14760584.2014.883285
- 514        8. Rosenbaum P, Tchitchek N, Joly C, Rodriguez Pozo A, Stimmer L, Langlois S, Hocini H, Gosse L,  
515        Pejovski D, Cosma A, et al. Vaccine Inoculation Route Modulates Early Immunity and Consequently  
516        Antigen-Specific Immune Response. *Front Immunol* (2021) 12:645210.  
517        doi:10.3389/fimmu.2021.645210
- 518        9. Palgen J-L, Tchitchek N, Elhmouzi-Younes J, Delandre S, Namet I, Rosenbaum P, Dereuddre-  
519        Bosquet N, Martinon F, Cosma A, Lévy Y, et al. Prime and Boost Vaccination Elicit a Distinct Innate  
520        Myeloid Cell Immune Response. *Scientific Reports* (2018) 8:3087. doi:10.1038/s41598-018-21222-  
521        2
- 522        10. Palgen J-L, Tchitchek N, Rodriguez-Pozo A, Jouhault Q, Abdelhouahab H, Dereuddre-Bosquet N,  
523        Contreras V, Martinon F, Cosma A, Lévy Y, et al. Innate and secondary humoral responses are  
524        improved by increasing the time between MVA vaccine immunizations. *npj Vaccines* (2020) 5:1–  
525        16. doi:10.1038/s41541-020-0175-8
- 526        11. Rahman AH, Tordesillas L, Berin MC. Heparin reduces nonspecific eosinophil staining artifacts in  
527        mass cytometry experiments. *Cytometry A* (2016) 89:601–607. doi:10.1002/cyto.a.22826
- 528        12. Finck R, Simonds EF, Jager A, Krishnaswamy S, Sachs K, Fantl W, Pe'er D, Nolan GP, Bendall SC.  
529        Normalization of mass cytometry data with bead standards. *Cytometry A* (2013) 83:483–494.  
530        doi:10.1002/cyto.a.22271

- 531 13. Qiu P, Simonds EF, Bendall SC, Gibbs KD, Bruggner RV, Linderman MD, Sachs K, Nolan GP, Plevritis  
532 SK. Extracting a cellular hierarchy from high-dimensional cytometry data with SPADE. *Nat*  
533 *Biotechnol* (2011) 29:886–891. doi:10.1038/nbt.1991
- 534 14. Gautreau G, Pejoski D, Le Grand R, Cosma A, Beignon A-S, Tchitchek N. SPADEVizR: an R package  
535 for visualization, analysis and integration of SPADE results. *Bioinformatics* (2017) 33:779–781.  
536 doi:10.1093/bioinformatics/btw708
- 537 15. Platon L, Pejoski D, Gautreau G, Targat B, Le Grand R, Beignon A-S, Tchitchek N. A computational  
538 approach for phenotypic comparisons of cell populations in high-dimensional cytometry data.  
539 *Methods* (2018) 132:66–75. doi:10.1016/j.ymeth.2017.09.005
- 540 16. Plotkin SA. Correlates of protection induced by vaccination. *Clin Vaccine Immunol* (2010) 17:1055–  
541 1065. doi:10.1128/CVI.00131-10
- 542 17. Pittman PR, Hahn M, Lee HS, Koca C, Samy N, Schmidt D, Hornung J, Weidenthaler H, Heery CR,  
543 Meyer TPH, et al. Phase 3 Efficacy Trial of Modified Vaccinia Ankara as a Vaccine against Smallpox.  
544 *N Engl J Med* (2019) 381:1897–1908. doi:10.1056/NEJMoa1817307
- 545 18. Palgen J-L, Feraoun Y, Dzangué-Tchoupou G, Joly C, Martinon F, Le Grand R, Beignon A-S. Optimize  
546 Prime/Boost Vaccine Strategies: Trained Immunity as a New Player in the Game. *Front Immunol*  
547 (2021) 12:612747. doi:10.3389/fimmu.2021.612747
- 548 19. Antal-Szalmas P, Strijp JA, Weersink AJ, Verhoef J, Van Kessel KP. Quantitation of surface CD14 on  
549 human monocytes and neutrophils. *J Leukoc Biol* (1997) 61:721–728. doi:10.1002/jlb.61.6.721
- 550 20. Arunachalam PS, Scott MKD, Hagan T, Li C, Feng Y, Wimmers F, Grigoryan L, Trisal M, Edara VV, Lai  
551 L, et al. Systems vaccinology of the BNT162b2 mRNA vaccine in humans. *Nature* (2021) 596:410–  
552 416. doi:10.1038/s41586-021-03791-x
- 553 21. Cross DL, Verheul MK, Leipold MD, Obermoser G, Jin C, Jones E, Starr JS, Mohorianu I, Blohmke CJ,  
554 Maecker HT, et al. Vi-Vaccinations Induce Heterogeneous Plasma Cell Responses That Associate  
555 With Protection From Typhoid Fever. *Front Immunol* (2020) 11:574057.  
556 doi:10.3389/fimmu.2020.574057
- 557 22. DeGottardi Q, Gates TJ, Yang J, James EA, Malhotra U, Chow I-T, Simoni Y, Fehlings M, Newell EW,  
558 DeBerg HA, et al. Ontogeny of different subsets of yellow fever virus-specific circulatory CXCR5+  
559 CD4+ T cells after yellow fever vaccination. *Sci Rep* (2020) 10:15686. doi:10.1038/s41598-020-  
560 72610-6
- 561 23. Mueller S, Taitt JM, Villanueva-Meyer JE, Bonner ER, Nejo T, Lulla RR, Goldman S, Banerjee A, Chi  
562 SN, Whipple NS, et al. Mass cytometry detects H3.3K27M-specific vaccine responses in diffuse  
563 midline glioma. *J Clin Invest* (2020) 130:6325–6337. doi:10.1172/JCI140378
- 564 24. Reeves PM, Raju Paul S, Baeten L, Korek SE, Yi Y, Hess J, Sobell D, Scholzen A, Garritsen A, De Groot  
565 AS, et al. Novel multiparameter correlates of *Coxiella burnetii* infection and vaccination identified  
566 by longitudinal deep immune profiling. *Sci Rep* (2020) 10:13311. doi:10.1038/s41598-020-69327-  
567 x
- 568 25. Lingblom CMD, Kowli S, Swaminathan N, Maecker HT, Lambert SL. Baseline immune profile by  
569 CyTOF can predict response to an investigational adjuvanted vaccine in elderly adults. *J Transl Med*  
570 (2018) 16:153. doi:10.1186/s12967-018-1528-1



- 571 26. Pejoski D, Tchitchek N, Rodriguez Pozo A, Elhmouzi-Younes J, Yousfi-Bogniaho R, Rogez-Kreuz C,  
572 Clayette P, Dereuddre-Bosquet N, Lévy Y, Cosma A, et al. Identification of Vaccine-Altered  
573 Circulating B Cell Phenotypes Using Mass Cytometry and a Two-Step Clustering Analysis. *J Immunol*  
574 (2016) 196:4814–4831. doi:10.4049/jimmunol.1502005
- 575 27. Swadling L, Capone S, Antrobus RD, Brown A, Richardson R, Newell EW, Halliday J, Kelly C, Bowen  
576 D, Fergusson J, et al. A human vaccine strategy based on chimpanzee adenoviral and MVA vectors  
577 that primes, boosts, and sustains functional HCV-specific T cell memory. *Sci Transl Med* (2014)  
578 6:261ra153. doi:10.1126/scitranslmed.3009185
- 579 28. Olsen LR, Leipold MD, Pedersen CB, Maecker HT. The anatomy of single cell mass cytometry data.  
580 *Cytometry A* (2019) 95:156–172. doi:10.1002/cyto.a.23621
- 581 29. Trussart M, Teh CE, Tan T, Leong L, Gray DH, Speed TP. Removing unwanted variation with  
582 CytofRUV to integrate multiple CyTOF datasets. *Elife* (2020) 9:e59630. doi:10.7554/eLife.59630
- 583 30. Lim HS, Qiu P. JSOM: Jointly-evolving self-organizing maps for alignment of biological datasets and  
584 identification of related clusters. *PLoS Comput Biol* (2021) 17:e1008804.  
585 doi:10.1371/journal.pcbi.1008804
- 586 31. Ogishi M, Yang R, Gruber C, Zhang P, Pelham SJ, Spaan AN, Rosain J, Chbihi M, Han JE, Rao VK, et  
587 al. Multibatch Cytometry Data Integration for Optimal Immunophenotyping. *J Immunol* (2021)  
588 206:206–213. doi:10.4049/jimmunol.2000854
- 589 32. Spitzer MH, Gherardini PF, Fragiadakis GK, Bhattacharya N, Yuan RT, Hotson AN, Finck R, Carmi Y,  
590 Zunder ER, Fantl WJ, et al. IMMUNOLOGY. An interactive reference framework for modeling a  
591 dynamic immune system. *Science* (2015) 349:1259425. doi:10.1126/science.1259425
- 592 33. Orlova DY, Meehan S, Parks D, Moore WA, Meehan C, Zhao Q, Ghosn EEB, Herzenberg LA, Walther  
593 G. QFMatch: multidimensional flow and mass cytometry samples alignment. *Sci Rep* (2018)  
594 8:3291. doi:10.1038/s41598-018-21444-4
- 595 34. Ng LG, Ostuni R, Hidalgo A. Heterogeneity of neutrophils. *Nat Rev Immunol* (2019) 19:255–265.  
596 doi:10.1038/s41577-019-0141-8
- 597 35. Costa S, Bevilacqua D, Cassatella MA, Scapini P. Recent advances on the crosstalk between  
598 neutrophils and B or T lymphocytes. *Immunology* (2019) 156:23–32. doi:10.1111/imm.13005
- 599 36. Leliefeld PHC, Koenderman L, Pillay J. How Neutrophils Shape Adaptive Immune Responses. *Front*  
600 *Immunol* (2015) 6:471. doi:10.3389/fimmu.2015.00471
- 601 37. Lin A, Loré K. Granulocytes: New Members of the Antigen-Presenting Cell Family. *Front Immunol*  
602 (2017) 8:1781. doi:10.3389/fimmu.2017.01781
- 603 38. Vono M, Lin A, Norrby-Teglund A, Koup RA, Liang F, Loré K. Neutrophils acquire the capacity for  
604 antigen presentation to memory CD4+ T cells in vitro and ex vivo. *Blood* (2017) 129:1991–2001.  
605 doi:10.1182/blood-2016-10-744441
- 606 39. Naranjo-Gomez M, Lambour J, Piechaczyk M, Pelegrin M. Neutrophils are essential for induction  
607 of vaccine-like effects by antiviral monoclonal antibody immunotherapies. *JCI Insight* (2018) 3:  
608 doi:10.1172/jci.insight.97339

- 609 40. Parsa R, Lund H, Georgoudaki A-M, Zhang X-M, Ortlieb Guerreiro-Cacais A, Grommisch D,  
610 Warnecke A, Croxford AL, Jagodic M, Becher B, et al. BAFF-secreting neutrophils drive plasma cell  
611 responses during emergency granulopoiesis. *J Exp Med* (2016) 213:1537–1553.  
612 doi:10.1084/jem.20150577
- 613 41. Musich T, Rahman MA, Mohanram V, Miller-Novak L, Demberg T, Venzon DJ, Felber BK, Franchini  
614 G, Pavlakis GN, Robert-Guroff M. Neutrophil Vaccination Dynamics and Their Capacity To Mediate  
615 B Cell Help in Rhesus Macaques. *The Journal of Immunology* (2018)  
616 doi:10.4049/jimmunol.1800677
- 617 42. de Bree LCJ, Koeken VACM, Joosten LAB, Aaby P, Benn CS, van Crevel R, Netea MG. Non-specific  
618 effects of vaccines: Current evidence and potential implications. *Semin Immunol* (2018) 39:35–43.  
619 doi:10.1016/j.smim.2018.06.002
- 620 43. Divangahi M, Aaby P, Khader SA, Barreiro LB, Bekkering S, Chavakis T, van Crevel R, Curtis N,  
621 DiNardo AR, Dominguez-Andres J, et al. Trained immunity, tolerance, priming and differentiation:  
622 distinct immunological processes. *Nat Immunol* (2021) 22:2–6. doi:10.1038/s41590-020-00845-6
- 623 44. Kaufmann E, Sanz J, Dunn JL, Khan N, Mendonça LE, Pacis A, Tzelepis F, Pernet E, Dumaine A,  
624 Grenier J-C, et al. BCG Educates Hematopoietic Stem Cells to Generate Protective Innate Immunity  
625 against Tuberculosis. *Cell* (2018) 172:176-190.e19. doi:10.1016/j.cell.2017.12.031
- 626 45. Cirovic B, de Bree LCJ, Groh L, Blok BA, Chan J, van der Velden WJFM, Bremmers MEJ, van Crevel  
627 R, Händler K, Picelli S, et al. BCG Vaccination in Humans Elicits Trained Immunity via the  
628 Hematopoietic Progenitor Compartment. *Cell Host & Microbe* (2020) 28:322-334.e5.  
629 doi:10.1016/j.chom.2020.05.014
- 630 46. Moorlag SJCFM, Rodriguez-Rosales YA, Gillard J, Fanucchi S, Theunissen K, Novakovic B, de Bont  
631 CM, Negishi Y, Fok ET, Kalafati L, et al. BCG Vaccination Induces Long-Term Functional  
632 Reprogramming of Human Neutrophils. *Cell Rep* (2020) 33:108387.  
633 doi:10.1016/j.celrep.2020.108387
- 634 47. Khader SA, Divangahi M, Hanekom W, Hill PC, Maeurer M, Makar KW, Mayer-Barber KD, Mhlanga  
635 MM, Nemes E, Schlesinger LS, et al. Targeting innate immunity for tuberculosis vaccination. *J Clin  
636 Invest* (2019) 129:3482–3491. doi:10.1172/JCI128877
- 637 48. Kleinnijenhuis J, Quintin J, Preijers F, Joosten LAB, Ifrim DC, Saeed S, Jacobs C, van Loenhout J, de  
638 Jong D, Stunnenberg HG, et al. Bacille Calmette-Guerin induces NOD2-dependent nonspecific  
639 protection from reinfection via epigenetic reprogramming of monocytes. *Proceedings of the  
640 National Academy of Sciences* (2012) 109:17537–17542. doi:10.1073/pnas.1202870109
- 641 49. Hamilton SE, Badovinac VP, Beura LK, Pierson M, Jameson SC, Masopust D, Griffith TS. New  
642 Insights into the Immune System Using Dirty Mice. *J Immunol* (2020) 205:3–11.  
643 doi:10.4049/jimmunol.2000171
- 644 50. Vierboom MPM, Dijkman K, Sombroek CC, Hofman SO, Boot C, Vervenne RAW, Haanstra KG, van  
645 der Sande M, van Emst L, Domínguez-Andrés J, et al. Stronger induction of trained immunity by  
646 mucosal BCG or MTBVAC vaccination compared to standard intradermal vaccination. *Cell Rep Med*  
647 (2021) 2:100185. doi:10.1016/j.xcrm.2020.100185

- 648 51. Liu H, Yu W, Tang X, Wang H, Ouyang W, Zhou J, Chen Z. The route of inoculation determines the  
649 tissue tropism of modified vaccinia Tiantan expressing the spike glycoprotein of SARS-CoV in mice.  
650 *J Med Virol* (2010) 82:727–734. doi:10.1002/jmv.21667
- 651 52. Abadie V, Bonduelle O, Duffy D, Parizot C, Verrier B, Combadière B. Original encounter with  
652 antigen determines antigen-presenting cell imprinting of the quality of the immune response in  
653 mice. *PLoS ONE* (2009) 4:e8159. doi:10.1371/journal.pone.0008159
- 654 53. Gómez CE, Nájera JL, Domingo-Gil E, Ochoa-Callejero L, González-Aseguinolaza G, Esteban M. Virus  
655 distribution of the attenuated MVA and NYVAC poxvirus strains in mice. *J Gen Virol* (2007)  
656 88:2473–2478. doi:10.1099/vir.0.83018-0
- 657 54. Duffy D, Perrin H, Abadie V, Benhabiles N, Boissonnas A, Liard C, Descours B, Reboulleau D,  
658 Bonduelle O, Verrier B, et al. Neutrophils transport antigen from the dermis to the bone marrow,  
659 initiating a source of memory CD8+ T cells. *Immunity* (2012) 37:917–929.  
660 doi:10.1016/j.immuni.2012.07.015
- 661 55. Yu Q, Hu N, Ostrowski M. Poxvirus tropism for primary human leukocytes and hematopoietic cells.  
662 *Methods Mol Biol* (2009) 515:309–328. doi:10.1007/978-1-59745-559-6\_22
- 663 56. Singh P, Yao Y, Weliver A, Broxmeyer HE, Hong S-C, Chang C-H. Vaccinia virus infection modulates  
664 the hematopoietic cell compartments in the bone marrow. *Stem Cells* (2008) 26:1009–1016.  
665 doi:10.1634/stemcells.2007-0461
- 666 57. Mitroulis I, Ruppova K, Wang B, Chen L-S, Grzybek M, Grinenko T, Eugster A, Troullinaki M,  
667 Palladini A, Kourtzelis I, et al. Modulation of Myelopoiesis Progenitors Is an Integral Component of  
668 Trained Immunity. *Cell* (2018) 172:147-161.e12. doi:10.1016/j.cell.2017.11.034
- 669 58. Arts RJW, Moorlag SJCFM, Novakovic B, Li Y, Wang S-Y, Oosting M, Kumar V, Xavier RJ, Wijmenga  
670 C, Joosten LAB, et al. BCG Vaccination Protects against Experimental Viral Infection in Humans  
671 through the Induction of Cytokines Associated with Trained Immunity. *Cell Host & Microbe* (2018)  
672 23:89-100.e5. doi:10.1016/j.chom.2017.12.010
- 673 59. Sánchez-Ramón S, Conejero L, Netea MG, Sancho D, Palomares Ó, Subiza JL. Trained Immunity-  
674 Based Vaccines: A New Paradigm for the Development of Broad-Spectrum Anti-infectious  
675 Formulations. *Front Immunol* (2018) 9:2936. doi:10.3389/fimmu.2018.02936
- 676 60. Xing Z, Afkhami S, Bavananthasivam J, Fritz DK, D’Agostino MR, Vaseghi-Shanjani M, Yao Y,  
677 Jeyanathan M. Innate immune memory of tissue-resident macrophages and trained innate  
678 immunity: Re-vamping vaccine concept and strategies. *J Leukoc Biol* (2020) 108:825–834.  
679 doi:10.1002/JLB.4MR0220-446R

680 **FIGURE LEGENDS**

681 **Figure 1. Experimental approach. (A)** Experimental design. Six male and adult cynomolgus macaques  
682 were immunized two months apart with MVA HIV-B at a dose of  $4 \times 10^8$  PFU injected intradermally. Blood  
683 was drawn longitudinally at hours (H for hour), days (D for day), or months (M for month) before and after  
684 the first (PP for post-prime) and second (PB for post-boost) immunization to assess the inflammatory, innate,  
685 and humoral responses and the phenotype of blood innate myeloid cells by mass cytometry. Immunizations  
686 are indicated by the blue dotted lines **(B)** Immunogenicity of MVA injected ID. Individual (black) and mean  
687 (green, with standard deviation) titers of anti-MVA IgG (left) and nAb (right) in EDTA plasma were plotted  
688 over time. Anti-MVA IgG titers were measured by ELISA. The MVA neutralizing capacity was quantified using  
689 a cell-based assay and MVA-eGFP. Immunizations are indicated by the blue dotted lines. Titers were  
690 compared by Wilcoxon tests. Statistically significant p values ( $p < 0.05$ ) are indicated by an asterisk (\*).

691 **Figure 2. Leukocyte counts in blood after ID or SC immunizations. (A)** Longitudinal monitoring of total  
692 leukocyte, granulocyte (including neutrophils, eosinophils and basophils), and monocyte counts (in  
693 thousands per  $\mu\text{l}$  of blood) before and after ID immunizations for each animal. Immunizations are indicated  
694 by the blue dotted lines. Counts were compared to baseline using Wilcoxon tests. p-values  $< 0.05$  were  
695 considered statistically significant and are indicated by an asterisk (\*). **(B)** Comparison of leukocyte counts  
696 (in thousands per  $\mu\text{l}$  of blood) before and after immunization by the ID (in green) or SC (in black) route.  
697 Immunizations are indicated by the blue dotted lines. Counts were compared between routes of vaccine  
698 delivery using unpaired two-tailed t tests. Statistically significant p values ( $p < 0.05$ ) are indicated by an  
699 asterisk (\*).

700 **Figure 3. Comparison of cytokine and chemokine expression profiles in blood after ID or SC MVA**  
701 **immunizations.** The plasma concentration of 22 cytokines was measured before, 1 day, 7 days, and 14 days  
702 after MVA injected either ID ( $n = 6$ ) or SC ( $n = 5$ ). Areas under the curve from H0 to D14 post-immunization  
703 were calculated to represent an approximation of exposure over time, in  $\text{pg} \times \text{ml}^{-1} \times \text{day}$ . **(A)** The mean AUC of  
704 each cytokine after the first and second MVA ID injection is shown as a heatmap. Colors represent the AUC

705 values from the lowest (blue) to the highest (red), standardized for each row. Statistically significant  
706 differences ( $p < 0.05$ , Wilcoxon tests) between the 1<sup>st</sup> and 2<sup>nd</sup> injection are indicated by an asterisk (\*). **(B)**  
707 The mean AUC of each cytokine produced after the first ID (left) or SC (right) MVA injection is displayed as a  
708 pie-chart. Differentially expressed cytokines according to the vaccine delivery route are colored in dark green  
709 for cytokines with a higher concentration after ID injection than SC, in light green for those with a higher  
710 concentration after SC injection than ID, and in yellow for those produced only after SC injection. The size of  
711 the inner pie is proportional to the sum of the AUC of all cytokines. **(C)** Heatmap representation of individual  
712 AUC for each cytokine after the first ID or SC injection of MVA. Each row corresponds to a cytokine and each  
713 column to an animal. Dendrograms represent the hierarchal clustering of animals (upper) and cytokines (left)  
714 based on the Euclidean distance using the Ward2 clustering method. Colors represent the AUC values from  
715 the lowest (blue) to the highest (orange), standardized for each row.

716 **Figure 4. Analytical approach for mass cytometry characterization of granulocytes. (A)** Panel of  
717 antibodies for mass cytometry analysis. Fixed leukocytes were stained with a panel of metal-conjugated  
718 antibodies (**Table S1**). Markers in black were used to compare the phenotype of clusters between datasets.  
719 Markers in light grey were excluded from the analysis, not selected as SPADE clustering markers for the ID  
720 dataset, or not shared with the SC dataset. **(B)** Analysis pipeline of mass cytometry data. After ID  
721 immunizations, cells sharing a similar phenotype were clustered using the SPADE algorithm. Clusters were  
722 manually annotated on the SPADE tree, and granulocytes clusters identified (**Figure S2**), and further grouped  
723 into “phenotypic families” and “superfamilies” after categorization of their marker expression and  
724 hierarchical clustering. Finally, a comparison of marker expression categories based on the Manhattan  
725 distance was used to associate granulocytes from the two datasets analyzed separately that display a similar  
726 phenotype.

727 **Figure 5. Phenotypic diversity and dynamics in granulocytes after ID and SC MVA immunizations. (A)**  
728 Hierarchical clustering of granulocyte clusters represented as a heatmap. Each row corresponds to a cell  
729 cluster and each column to a marker. The level of expression of the markers was divided into five categories

730 ranging from white to brown. The dendrogram allowed the grouping of clusters with similar phenotypes into  
731 16 “phenotypic families” (numbered from 1 to 16) and “superfamilies” (named with letters between brackets,  
732 from A to E), colored based on the manual annotation as in (9). Neutro.: neutrophils. Ba.: basophils. **(B)**  
733 Comparisons of the phenotypes of granulocytes present in the ID (green) and SC (black) datasets. Black lines  
734 inside the circle connect phenotypically similar clusters after calculation of the Manhattan distance. The color  
735 code is identical to that of the heatmap. Neutro.: neutrophil. Mod.: moderately. Baso: basophils. **(C)** Pie  
736 charts representing the composition in granulocyte phenotypic families over time for each macaque after  
737 MVA immunizations by the ID route. Each slice represents a phenotypic family, for which the color is identical  
738 to that of the heatmap. The size of the pie is proportional to the cell concentration in the blood. Unavailable  
739 data are represented by empty circles.

740 **SUPPLEMENTARY FIGURE LEGENDS**

741 **Figure S1. Control samples.** The same fixed and frozen control samples were stained and acquired  
742 with the samples from the vaccinated animals after *ex vivo* restimulation with a mixture of TLR ligands.  
743 **(A)** Gating strategy to define the CD66<sup>high</sup> HLA-DR<sup>-</sup>, CD66<sup>-/mid</sup> HLA-DR<sup>-</sup>, and CD66<sup>-/mid</sup> HLADR<sup>+</sup> cell  
744 populations. The non-stimulated control sample for the first staining/acquisition session is shown. **(B)**  
745 Comparison of the staining profiles using overlaid histograms.

746 **Figure S2. SPADE tree annotation.** The topology of the SPADE tree is shown, with the color of each  
747 node of the SPADE tree representing the median expression of the indicated markers among all cells from  
748 the entire dataset with a scale adapted for each marker. This allowed the identification of the major blood  
749 cell populations, including granulocytes. The size of the node is not proportional to the number of cells it  
750 contains.

| Metal | Marker           | Clone        | Supplier                              | Catalog number | $\mu\text{g}/3$ millions leukocytes | Surface | Intra-cellular |
|-------|------------------|--------------|---------------------------------------|----------------|-------------------------------------|---------|----------------|
| 141Pr | CD66abce         | TET2         | Miltenyi                              | 120-014-229    | 0.3                                 | ●       |                |
| 142Nd | HLA-DR           | L243         | Ozyme                                 | 307651         | 0.2                                 | ●       |                |
| 143Nd | CD3              | SP34.2       | BD                                    | 551916         | 2.5                                 | ●       |                |
| 144Nd | CD64             | 10.1         | Miltenyi                              | 120-014-229    | 1.5                                 | ●       |                |
| 145Nd | CD8              | RPAT8        | BD                                    | 557084         | 1                                   | ●       |                |
| 146Nd | IL-6             | MQ2.13A5     | BD                                    | 554543         | 2                                   |         | ●              |
| 147Sm | CD123            | 7G3          | BD                                    | 554527         | 1                                   | ●       |                |
| 148Nd | IL-4             | 8D48         | BD                                    | 554515         | 2                                   |         | ●              |
| 149Sm | CD11a            | HI111        | Miltenyi                              | 120-014-229    | 2                                   | ●       |                |
| 150Nd | CD11b            | ICRF144      | BD                                    | 555386         | 0.5                                 | ●       |                |
| 151Eu | CD62L            | SK11         | Miltenyi                              | 120-014-229    | 2                                   | ●       |                |
| 152Sm | CD4              | L200         | BD                                    | 550625         | 2                                   | ●       |                |
| 153Eu | Fc $\epsilon$ RI | AER37 (CRA1) | eBioscience (ThermoFisher Scientific) | 14-5899-82     | 1.5                                 | ●       |                |
| 154Sm | CD86             | IT2.2        | BD                                    | 555663         | 1                                   | ●       |                |
| 155Gd | CD125            | A14          | BD                                    | 624084         | 0.5                                 | ●       |                |
| 156Gd | CD172a           | REA144       | Miltenyi                              | 120-014-229    | 1.5                                 | ●       |                |
| 158Gd | IP-10            | 6D4          | Miltenyi                              | 120-014-229    | 1                                   |         | ●              |
| 159Tb | CD45             | D058-1283    | BD                                    | 552566         | 0.2                                 | ●       |                |
| 160Gd | IL-1 $\alpha$    | 364/3B3      | Miltenyi                              | 120-014-229    | 2                                   |         | ●              |
| 161Dy | CD1c             | AF5910       | R&D systems (Biotechne)               | AF5910         | 0.5                                 | ●       |                |
| 162Dy | IL-12            | C8.6         | Miltenyi                              | 120-014-229    | 1                                   |         | ●              |
| 163Dy | CD32             | FLI8.26      | BD                                    | 555447         | 0.5                                 | ●       |                |
| 164Dy | IFN $\alpha$     | LT27/295     | Miltenyi                              | 120-014-229    | 0.5                                 |         | ●              |
| 165Ho | CD39             | eBioA1       | Biolegend                             | 328002         | 1                                   | ●       |                |
| 166Er | CCR5             | 3A9          | BD                                    | 556041         | 0.5                                 | ●       |                |
| 167Er | CD16             | 3G8          | Miltenyi                              | 120-012-311    | 2                                   | ●       |                |
| 168Er | CD11c            | 3.9          | Biolegend                             | 301639         | 1.5                                 | ●       |                |
| 169Tm | CXCR4            | 12G5         | BD                                    | 555971         | 0.75                                | ●       |                |
| 170Er | CD14             | M5E2         | BD                                    | 555396         | 1                                   | ●       |                |
| 171Yb | IL-8             | G265.8       | BD                                    | 554717         | 0.5                                 |         | ●              |
| 172Yb | CD23             | 9P25         | Beckman                               | IMBULK1        | 2.5                                 | ●       |                |



|       |       |        |                   |                 |     |   |
|-------|-------|--------|-------------------|-----------------|-----|---|
| 173Yb | CD141 | 1A4    | Fluidigm          | 3173002B        | 1.5 | ● |
| 174Yb | CD20  | 2H7    | BD                | 556631          | 1   | ● |
| 175Lu | CCR7  | G043H7 | Miltenyi          | 120-014-<br>229 | 1   | ● |
| 176Yb | CADM1 | 3 E1   | Clinisciences MBL | CM004-3         | 0.5 | ● |

751

752 **Supplementary Table 1. Antibody panel for mass cytometry.**

# FIGURE 1

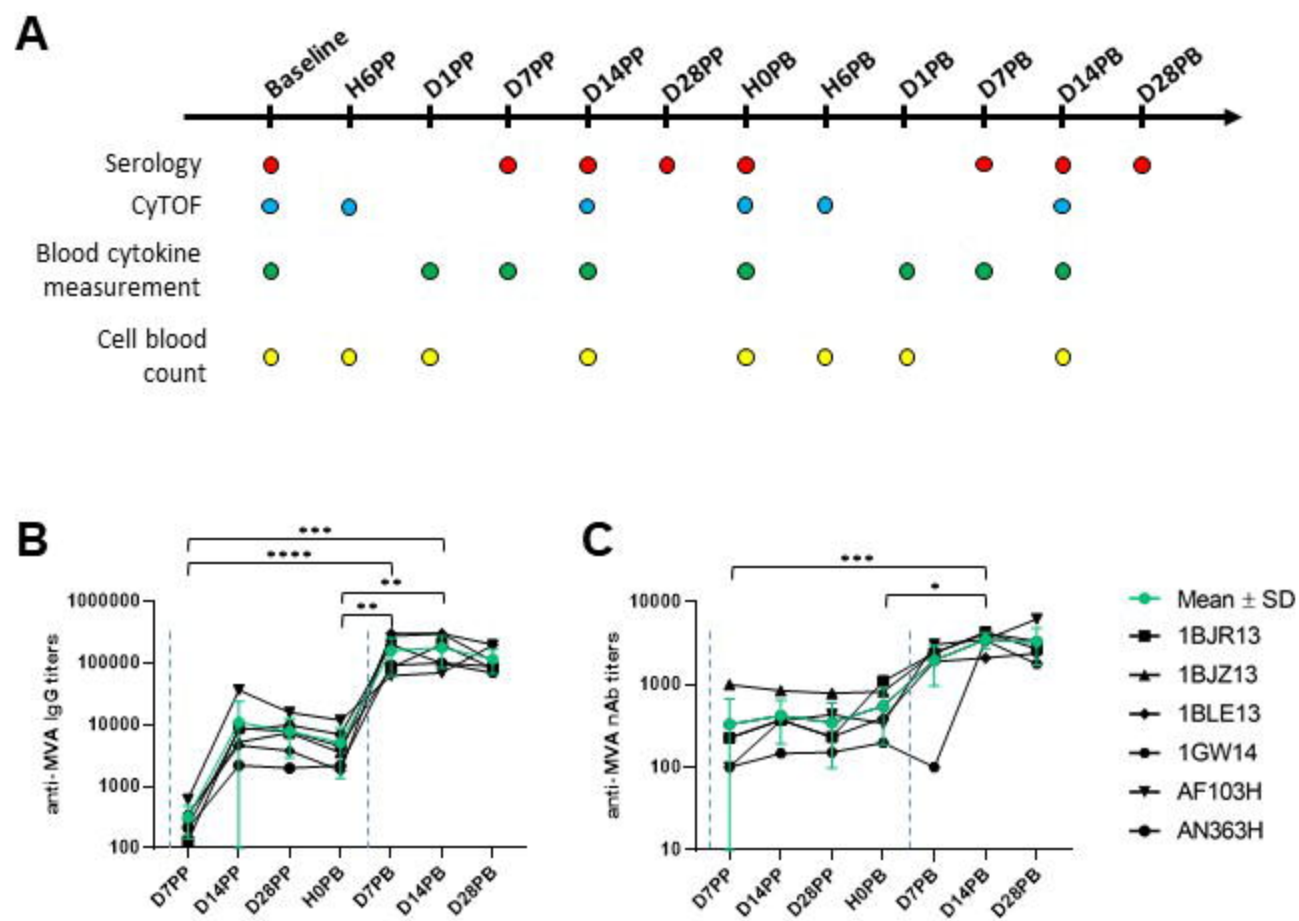

## FIGURE 2

A

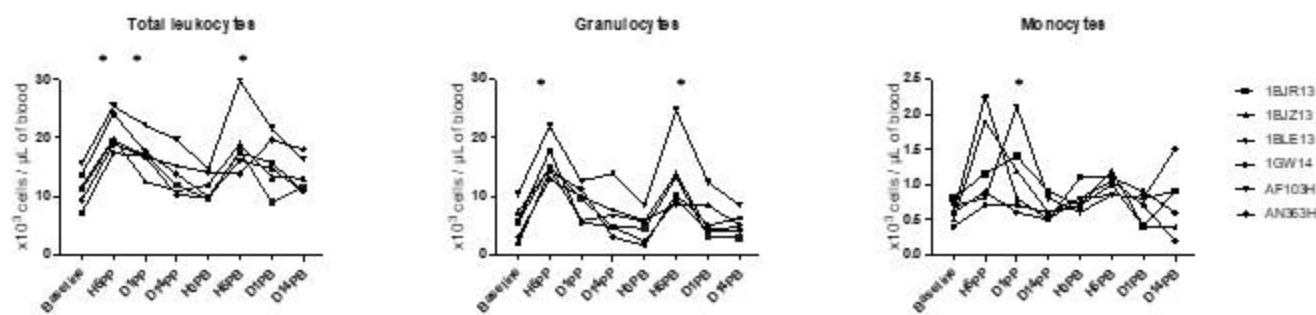

B

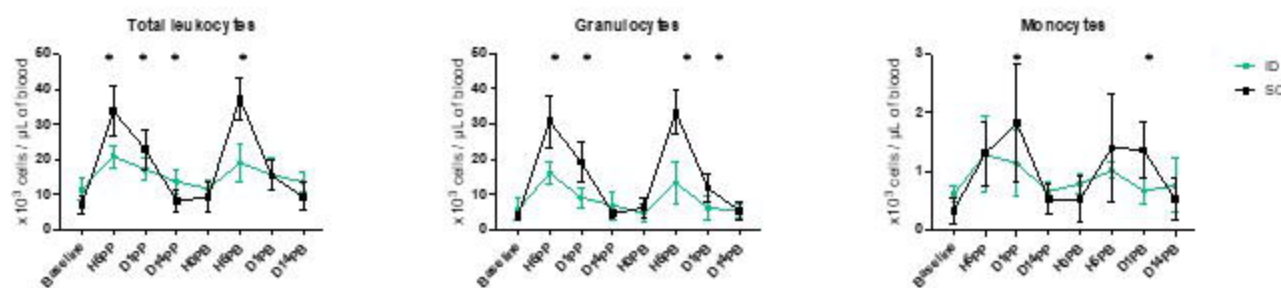

## FIGURE 3

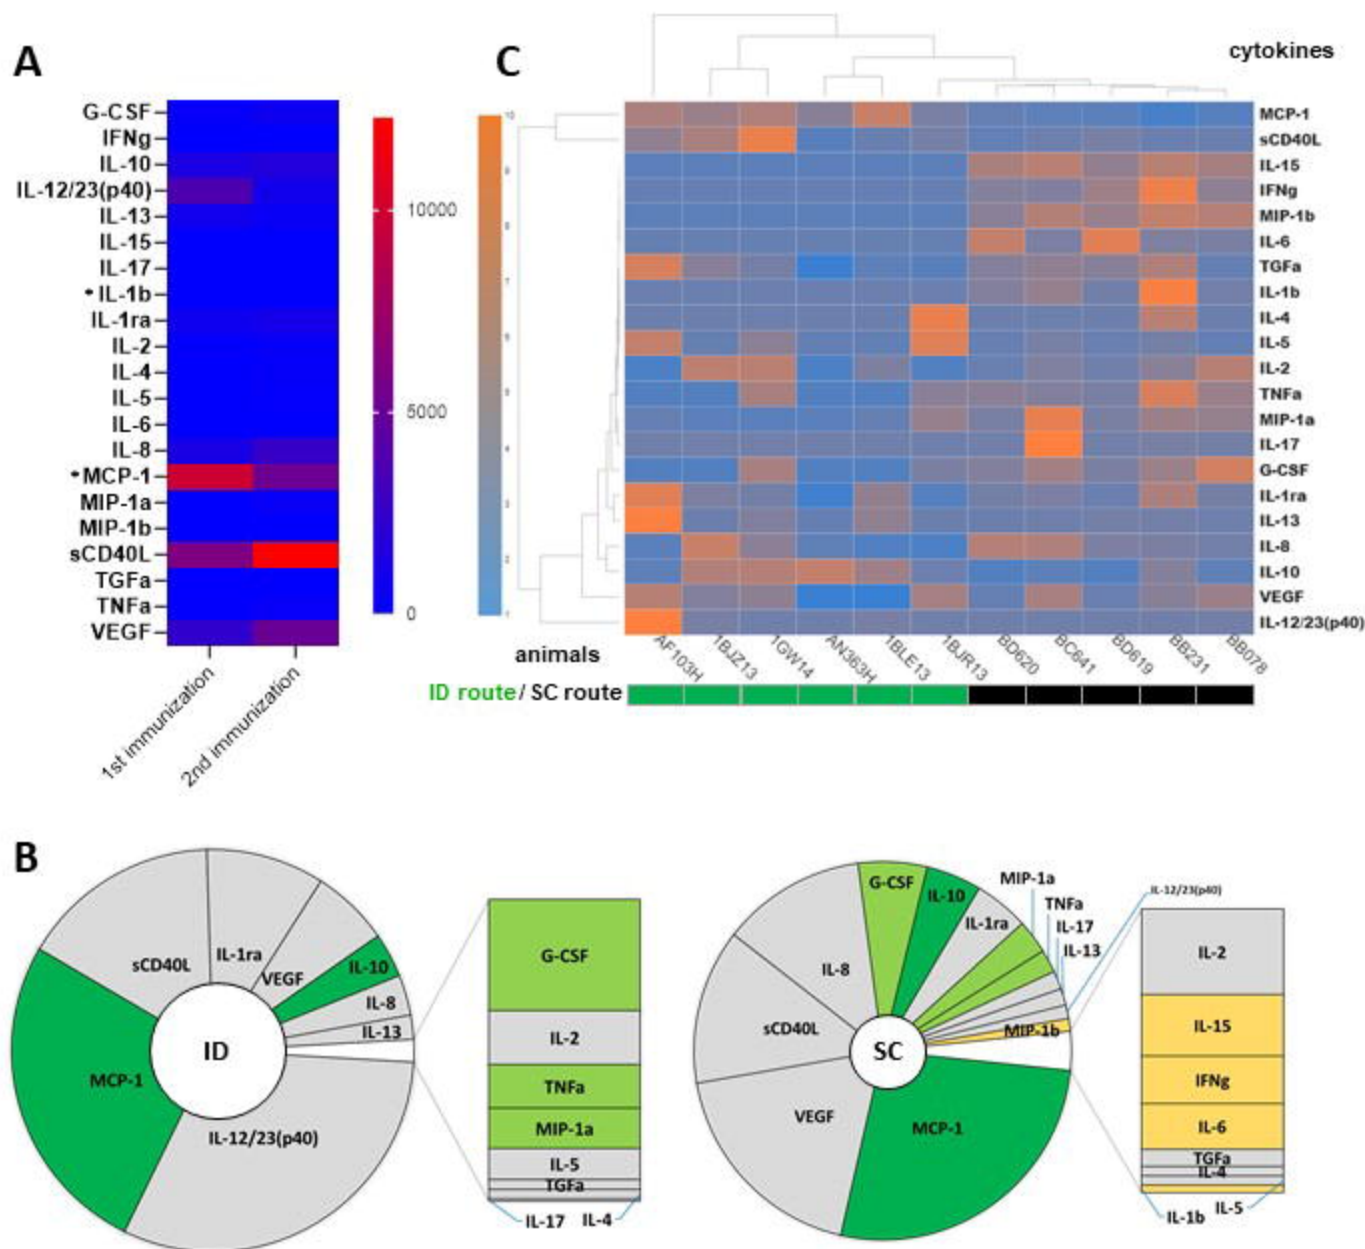

## FIGURE 4

A

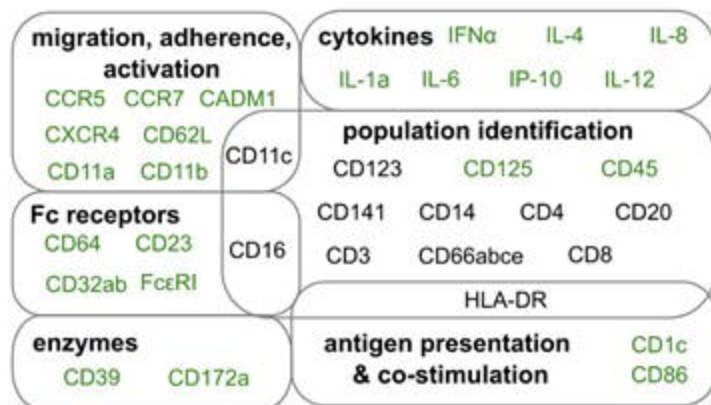

B

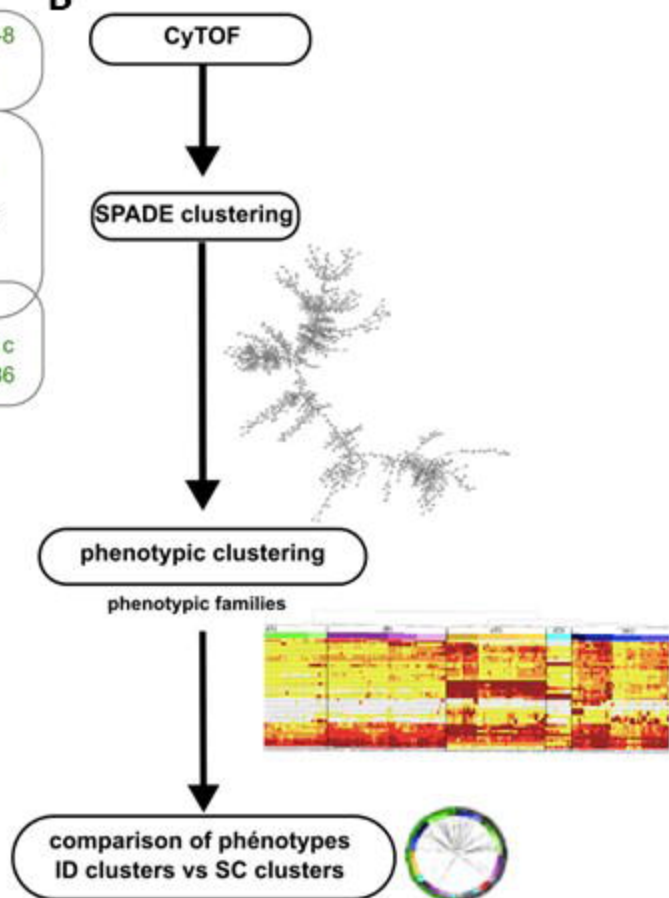

## FIGURE 5

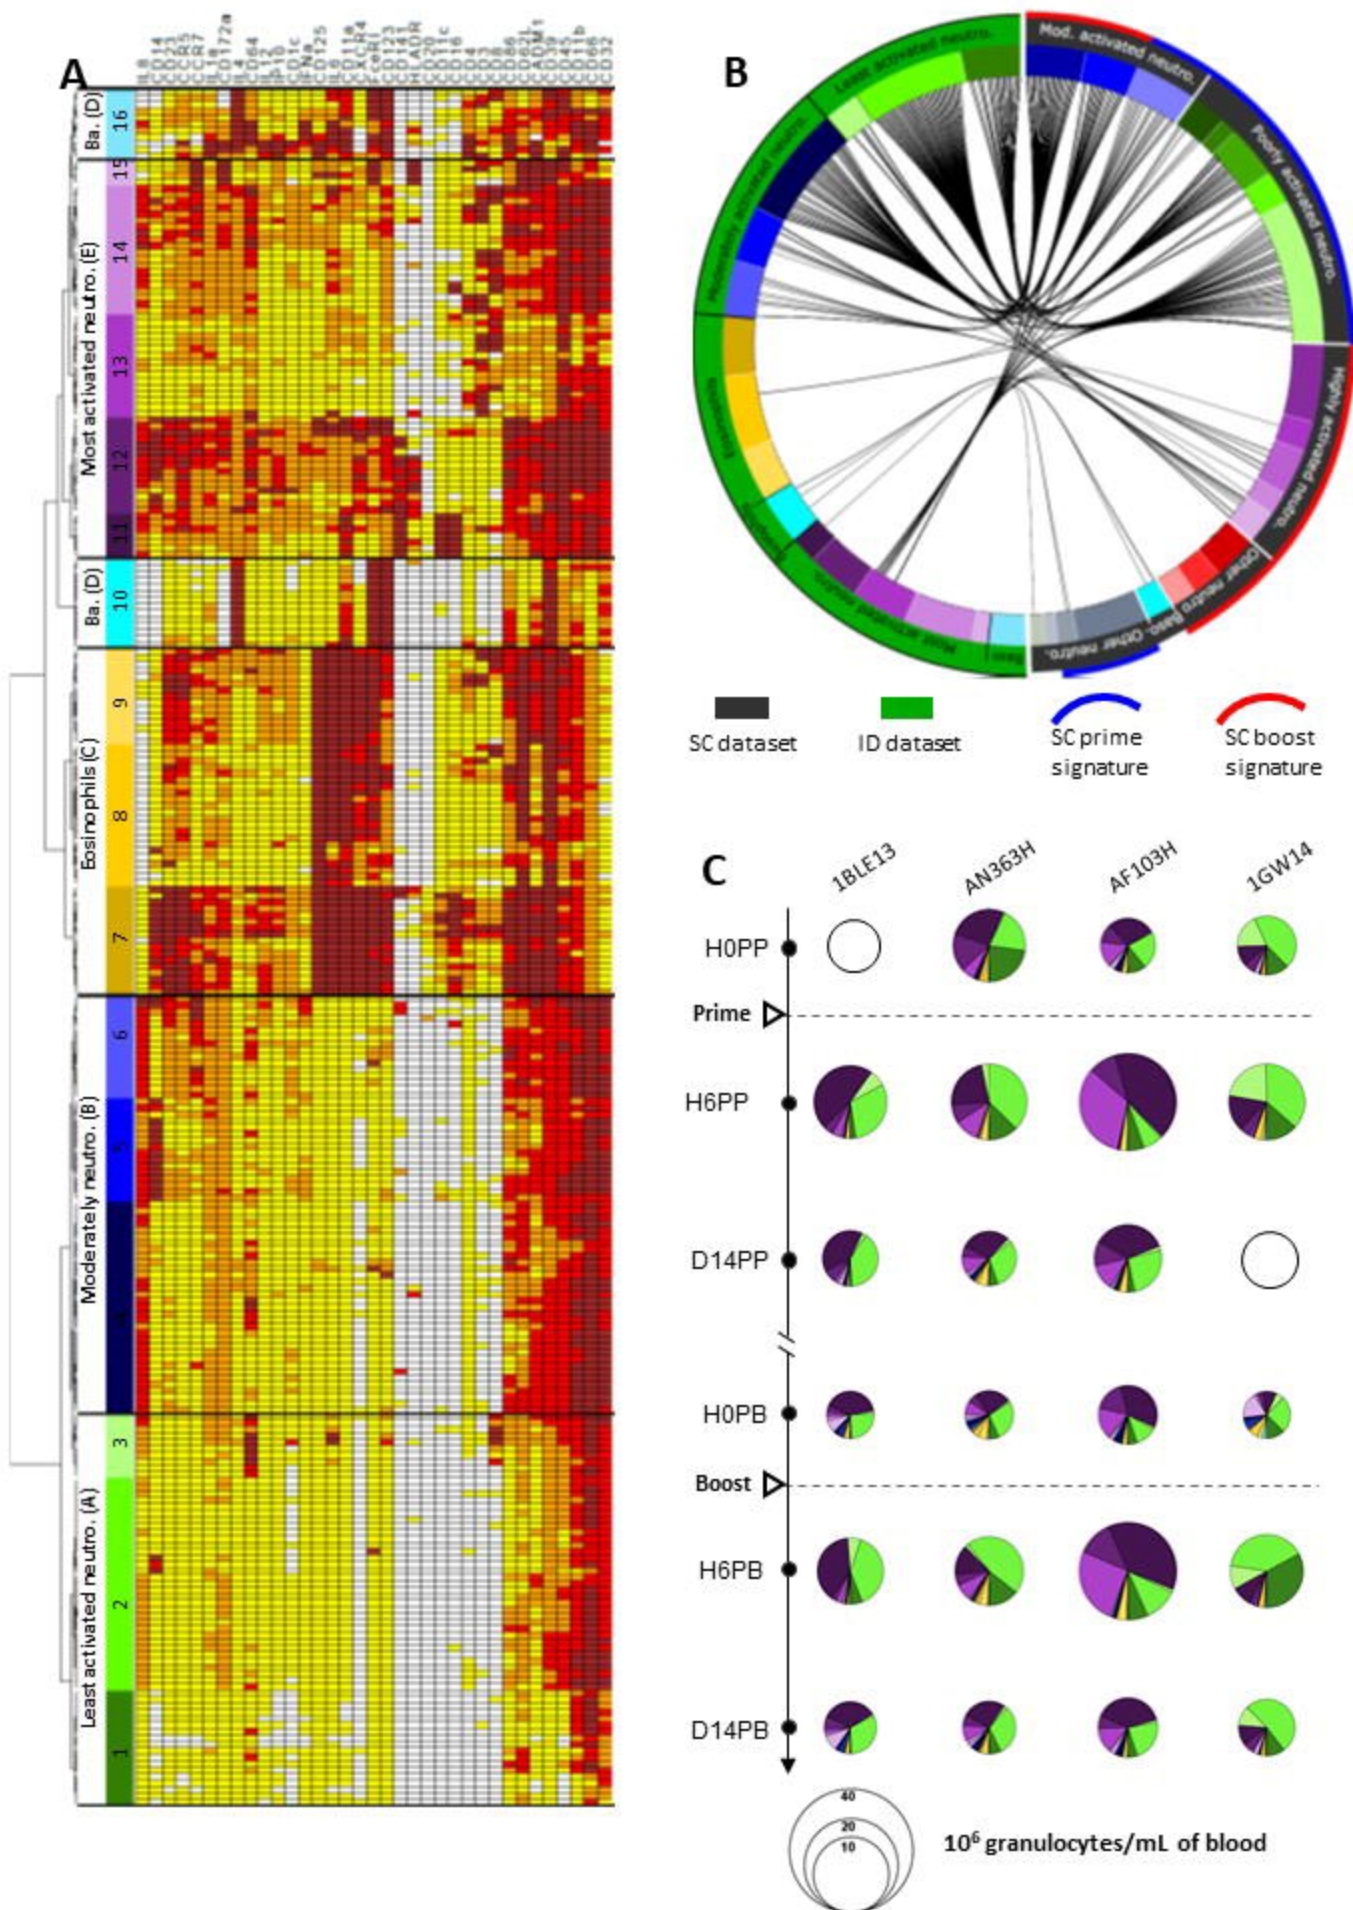

Source: https://www.biorxiv.org/content/biorxiv/early/2021/10/26/2021.10.26.465872.full.pdf
